# Supplementary material for: Structures and catalytic oxidative coupling reaction of four Co-MOFs modified with R-isophthalic acid (RH, OH and COOH) and trigonal ligands
Source: Royal Society of Chemistry journal article supplement (doi:10.1039/d1ce01221e), 2021-01-01
Supplement: d1ce01221e1.pdf [file d1ce01221e1.pdf]

# Supporting Information

## Structures and Catalytic Oxidative Coupling Reaction of Four Co-MOFs Modified by R-isophthalic acid (R=H, OH and COOH) and Trigonal ligands

Qing Liu<sup>a</sup>, Lin-Yan Zhang,<sup>a</sup> Yu-Mei Bao,<sup>a</sup> Na Zhang<sup>\*,a</sup>, Jian-Yong Zhang<sup>\*,a</sup>, Yuan-Yuan Xing<sup>a</sup>,  
Wei Deng,<sup>a</sup> Zhen-Jiang Liu<sup>\*,a</sup>

<sup>a</sup>School of Chemical and Environmental Engineering, Shanghai Institute of Technology, Shanghai 201418 (P. R. China).

E-mail: nzhang@sit.edu.cn, jianyong1106@163.com, zjliu@sit.edu.cn

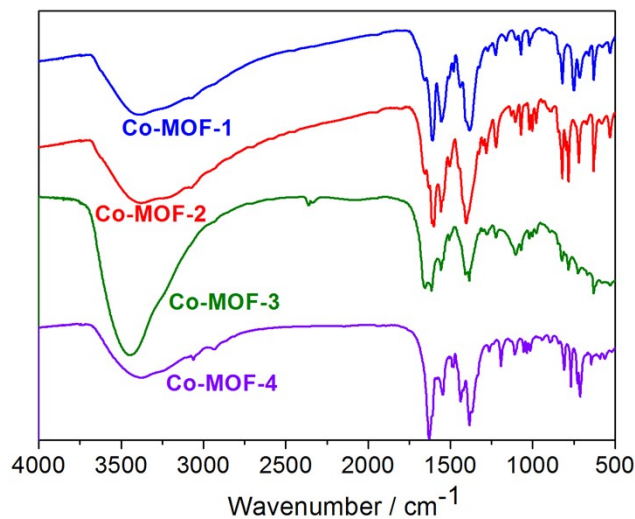

Fig. S1. The FT- IR spectra of the four **Co-MOFs** presented in this paper.

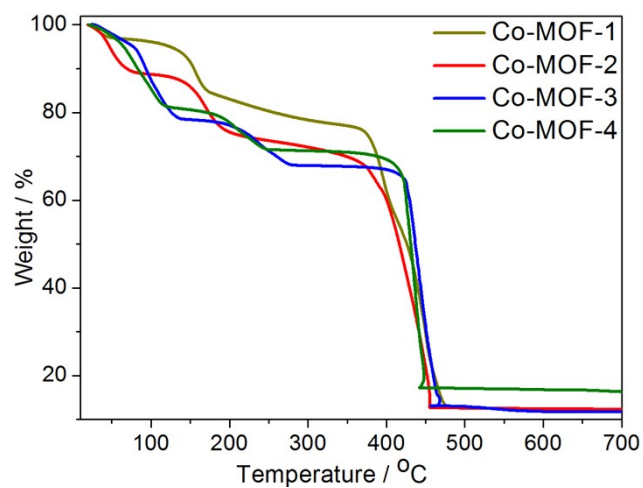

Fig. S2. The TGA curves for the reported four Co-MOFs in this paper.

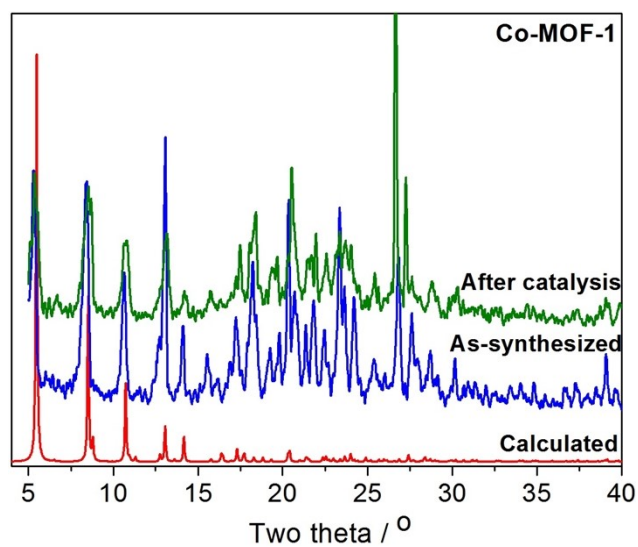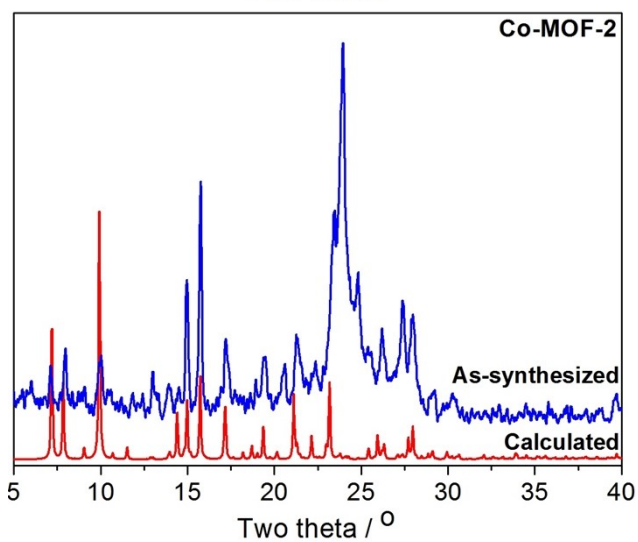

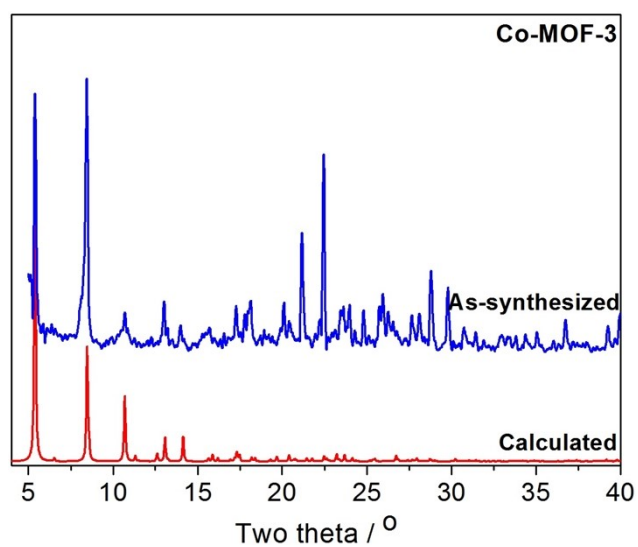

Fig. S3. The comparison of the observed and calculated PXRD patterns from the **Co-MOFs**.

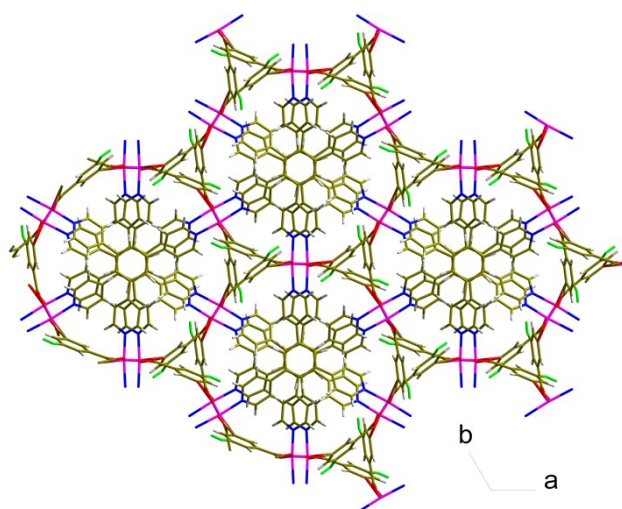

Fig. S4. The 3D framework of **Co-MOF-3**, showing the uncoordinated  $\text{-OH}$  groups in  $\text{OH-BDC}^{2-}$  ligands (highlighted in green color).

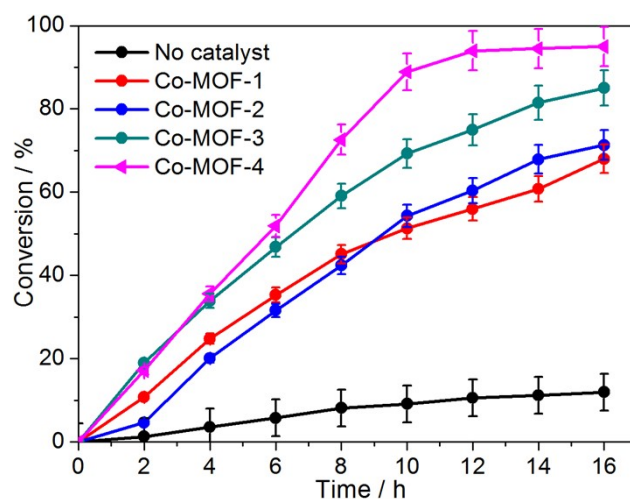

Fig. S5. Time dependence of conversion using different Co-MOFs as catalysts.

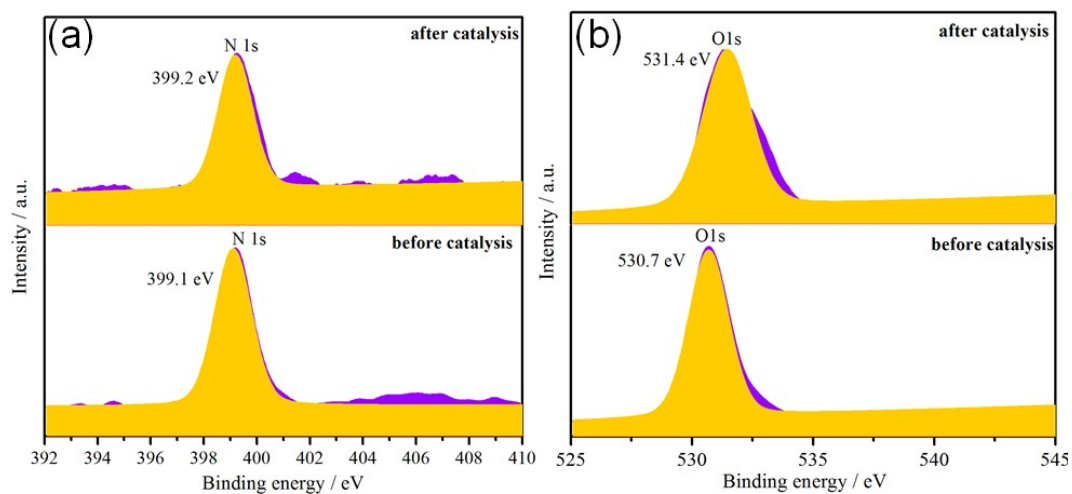

Fig. S6. The XPS survey spectra for N 1s (a) and O 1s (b) of Co-MOF-4 catalyst before and after catalysis reaction.

Table S1. Selected bond [ $\text{\AA}$ ] and angles [ $^\circ$ ] for Co-MOFs.

|             |            |               |            |
|-------------|------------|---------------|------------|
| Co1-O1      | 2.154(3)   | Co1-O2        | 2.193(4)   |
| Co1-O3#1    | 2.019(4)   | Co1-O4#1      | 2.060(3)   |
| Co1-N1      | 2.118(3)   | Co1-N2        | 2.159(3)   |
| O1-Co1-N1   | 98.70(12)  | O3#1-Co1-O4#2 | 119.66(14) |
| O3#2-Co1-N1 | 92.20(13)  | O4#2-Co1-N1   | 89.77(12)  |
| O3#1-Co1-O1 | 89.16(14)  | O4#2-Co1-O1   | 149.75(14) |
| O3#1-Co1-N2 | 89.22(14)  | O4#2-Co1-N2   | 84.97(12)  |
| N1-Co1-N2   | 174.56(13) | O1-Co1-N2     | 86.56(12)  |
| O3#1-Co1-O2 | 148.93(12) | O4#2-Co1-O2   | 91.41(13)  |
| N1-Co1-O2   | 87.48(14)  | O1-Co1-O2     | 60.28(12)  |
| N2-Co1-O2   | 94.01(14)  |               |            |

|                                                                                                                           |            |                |            |
|---------------------------------------------------------------------------------------------------------------------------|------------|----------------|------------|
| Symmetry codes for <b>Co-MOF-1</b> : #1 $-x+y+2/3, -x+1/3, z+1/3$ ;<br>#2 $x-y+1/3, x-1/3, -z+5/3$ .                      |            |                |            |
| Co1-O1#1                                                                                                                  | 1.997(3)   | Co1-O2         | 1.998(3)   |
| Co1-O3#3                                                                                                                  | 2.201(3)   | Co1-O4#3       | 2.249(3)   |
| Co1-N1                                                                                                                    | 2.153(3)   | Co1-N3#2       | 2.147(3)   |
| O1#1-Co1-O2                                                                                                               | 120.73(13) | O1#1- Co1-N3#2 | 93.43(12)  |
| O2-Co1-N3#2                                                                                                               | 88.97(12)  | O1#1- Co1-N1   | 88.68(12)  |
| O2-Co1-N1                                                                                                                 | 88.01(12)  | N3#2-Co1-N1    | 176.91(12) |
| O1#1-Co1-O3#3                                                                                                             | 87.21(13)  | O2-Co1-O3#3    | 151.40(13) |
| N3#2-Co1-O3#3                                                                                                             | 95.77(12)  | N1-Co1-O3#3    | 86.59(12)  |
| O1#1-Co1-O4#3                                                                                                             | 146.25(12) | O2-Co1-O4#3    | 92.61(12)  |
| N3#2-Co1-O4#3                                                                                                             | 92.16(12)  | N1-Co1-O4#3    | 87.32(12)  |
| O3#3-Co1-O4#3                                                                                                             | 59.11(12)  |                |            |
| Symmetry code for <b>Co-MOF-2</b> : #1 $-x+1/2, -y+1/2, -z$ ; #2<br>$x-1/2, -y+1/2, z-1/2$ ; #3 $-x+1/2, y+1/2, -z+1/2$ . |            |                |            |
| Co1-O3#1                                                                                                                  | 2.199(3)   | Co1-O4#1       | 2.178(3)   |
| Co1-O1                                                                                                                    | 2.008(3)   | Co1-O2#2       | 2.048(2)   |
| Co1-N1                                                                                                                    | 2.160(3)   | Co1-N2         | 2.137(3)   |
| O1-Co1-O2#2                                                                                                               | 118.29(11) | O1-Co1-N2      | 92.53(12)  |
| O2#2-Co1-N2                                                                                                               | 89.92(10)  | O1-Co1-N1      | 89.55(11)  |
| O2#2-Co1-N1                                                                                                               | 85.13(10)  | N2-Co1-N1      | 175.04(10) |
| O3#1-Co1-O2#2                                                                                                             | 150.15(12) | O2#2-Co1-O4#1  | 92.18(11)  |
| N2-Co1-O4#1                                                                                                               | 87.55(12)  | N1-Co1-O4#1    | 92.94(12)  |
| O3#1-Co1-O1                                                                                                               | 90.20(12)  | O4#1-Co1-O3#1  | 59.70(11)  |
| N2-Co1-O3#1                                                                                                               | 98.00(11)  | N1-Co1-O3#1    | 86.49(11)  |
| Symmetry code for <b>Co-MOF-3</b> : #1 $-x+y+2/3, -x+4/3, z+1/3$ ;<br>#2 $-x+4/3, -y+5/3, -z+2/3$ .                       |            |                |            |
| Co1-O1                                                                                                                    | 2.0001(10) | Co1-O2#1       | 2.0082(8)  |
| Co1-O6#2                                                                                                                  | 2.1219(8)  | Co1-O5#2       | 2.2833(10) |
| Co1-N1                                                                                                                    | 2.1756(11) | Co1-N2#2       | 2.1627(12) |
| Co2-O3                                                                                                                    | 2.0810(8)  | Co2-O7         | 2.1096(11) |
| Co2-N3#4                                                                                                                  | 2.1633(11) |                |            |
| O1-Co1-O2#1                                                                                                               | 113.13(4)  | O1- Co1-O6#2   | 91.80(4)   |
| O2#1-Co1-O6#2                                                                                                             | 154.95(4)  | O1- Co1-N2#2   | 91.10(5)   |
| O2#2-Co1-N2#2                                                                                                             | 89.43(4)   | O6#2-Co1-N2#2  | 87.62(4)   |
| O1-Co1-N1                                                                                                                 | 89.20(5)   | O2#1-Co1-N1    | 90.47(4)   |
| O6#2-Co1-N1                                                                                                               | 92.34(4)   | N2#2-Co1-N1    | 179.70(4)  |
| O1-Co1-O5#2                                                                                                               | 150.93(4)  | O2#1-Co1-O5#2  | 95.92(3)   |
| O6#2-Co1-O5#2                                                                                                             | 59.25(3)   | N2#2-Co1-O5#2  | 90.38(4)   |
| N1-Co1-O5#2                                                                                                               | 89.34(4)   | O3-Co2-O3#3    | 180.00(5)  |
| O3-Co2-O7                                                                                                                 | 88.94(4)   | O3#3-Co2-O7    | 91.05(4)   |
| O7-Co2-O7#3                                                                                                               | 180.0      | O3-Co2-N3#4    | 91.21(4)   |
| O3#3-Co2-N3#4                                                                                                             | 88.79(4)   | O7-Co2-N3#4    | 89.33(5)   |

|                                                                                                                               |          |               |       |
|-------------------------------------------------------------------------------------------------------------------------------|----------|---------------|-------|
| O7#3-Co2-N3#4                                                                                                                 | 90.67(5) | N3#4-Co2-N3#5 | 180.0 |
| Symmetry code for <b>Co-MOF-4</b> : #1 -x+1, -y, -z+1; #2 -x, -y, -z+1; #3 -x+1, -y+1, -z; #4 -x, -y+1, -z+1; #5 x+1, y, z-1. |          |               |       |

Table S2. Effect of the reaction temperature and time for the oxidative coupling reaction.<sup>a</sup>

| Entry | Catalyst        | Base | Temp.(°C) | Time (h) | Conv.(%) <sup>b</sup> |
|-------|-----------------|------|-----------|----------|-----------------------|
| 1     |                 |      |           | 2        | 7                     |
| 2     | <b>Co-MOF-4</b> | KOH  | rt.       | 6        | 30                    |
| 3     |                 |      |           | 12       | 50                    |
| 4     |                 |      |           | 2        | 13                    |
| 5     | <b>Co-MOF-4</b> | KOH  | 60        | 6        | 42                    |
| 6     |                 |      |           | 12       | 76                    |
| 7     | <b>Co-MOF-4</b> | KOH  | 100       | 2        | 18                    |
| 8     |                 |      |           | 6        | 54                    |
| 9     |                 |      |           | 8        | 73                    |
| 10    | <b>Co-MOF-4</b> | KOH  | 120       | 2        | 48                    |
| 11    |                 |      |           | 8        | 85                    |
| 12    |                 |      |           | 12       | 74                    |

<sup>a</sup> 1a (1.0 mmol), 2a (1.5 mmol), **Co-MOF-4** (0.2 mmol%), KOH (0.1 mmol), pyrene (100  $\mu$ L, as an internal standard), solvent-free conditions; <sup>b</sup> determined by GC-MS.

The computed results of the (3,8)-connected net of **Co-MOF-1** and **Co-MOF-3** by TOPOS 4.0 are as follows:

Topology for Sc1

-----

Atom Sc1 links by bridge ligands and has

| Common vertex with |   |         |        |        | R(A-A)  |         |   |
|--------------------|---|---------|--------|--------|---------|---------|---|
| V                  | 2 | 0.3333  | 0.6667 | 0.4161 | (0 0 0) | 7.920A  | 1 |
| V                  | 2 | 0.0000  | 0.0000 | 0.2506 | (0 0 0) | 7.920A  | 1 |
| V                  | 1 | 0.0000  | 0.0000 | 0.4281 | (0-1 0) | 7.984A  | 1 |
| V                  | 1 | 0.3333  | 0.6667 | 0.2386 | (0 0 0) | 7.984A  | 1 |
| Sc                 | 1 | 0.5000  | 0.5000 | 0.0000 | (0 0-1) | 10.591A | 1 |
| Sc                 | 1 | -0.1667 | 0.1667 | 0.6667 | (0 0 1) | 10.591A | 1 |
| Sc                 | 1 | 0.3333  | 0.1667 | 0.6667 | (0 0 1) | 10.591A | 1 |
| Sc                 | 1 | 0.0000  | 0.5000 | 0.0000 | (0 0-1) | 10.591A | 1 |

Topology for V1

-----

Atom V1 links by bridge ligands and has

| Common vertex with |   |        |        |        | R(A-A)  |        |   |
|--------------------|---|--------|--------|--------|---------|--------|---|
| Sc                 | 1 | 0.6667 | 0.8333 | 0.3333 | (1 1 0) | 7.984A | 1 |
| Sc                 | 1 | 0.1667 | 0.8333 | 0.3333 | (0 1 0) | 7.984A | 1 |
| Sc                 | 1 | 0.1667 | 0.3333 | 0.3333 | (0 0 0) | 7.984A | 1 |

Topology for V2

-----  
Atom V2 links by bridge ligands and has

| Common vertex with |         |         |        |          | R(A-A) |   |
|--------------------|---------|---------|--------|----------|--------|---|
| Sc 1               | -0.3333 | -0.1667 | 0.3333 | ( 0 0 0) | 7.920A | 1 |
| Sc 1               | 0.1667  | -0.1667 | 0.3333 | ( 0 0 0) | 7.920A | 1 |
| Sc 1               | 0.1667  | 0.3333  | 0.3333 | ( 0 0 0) | 7.920A | 1 |

-----  
Structural group analysis

-----  
Structural group No 1

-----  
Structure consists of 3D framework with V4Sc3

Coordination sequences

-----  
Sc1: 1 2 3 4 5 6 7 8 9 10  
Cum 9 33 89 195 363 605 937 1371 1923 2605

-----  
V1: 1 2 3 4 5 6 7 8 9 10  
Num 3 16 41 86 145 221 302 406 515 647  
Cum 4 20 61 147 292 513 815 1221 1736 2383

-----  
V2: 1 2 3 4 5 6 7 8 9 10  
Num 3 16 41 86 145 221 302 406 515 647  
Cum 4 20 61 147 292 513 815 1221 1736 2383

-----  
TD10=2478

Vertex symbols for selected sublattice

-----  
Sc1 Point (Schlafli) symbol: {4<sup>12</sup>;6<sup>10</sup>;8<sup>6</sup>}

Extended point

symbol:[4.4.4.4.4.4.4.4(2).4(2).4(2).4(2).6(3).6(3).6(3).6(3).6(3).6(3).6(3).6(3).6(3).6(6).6(6).8(12).8(12).8(12).8(66).8(66)]

-----  
V1 Point (Schlafli) symbol: {4<sup>3</sup>}

Extended point symbol:[4(2).4(2).4(2)]

-----  
V2 Point (Schlafli) symbol: {4<sup>3</sup>}

Extended point symbol:[4(2).4(2).4(2)]

Point (Schlafli) symbol for net:  $\{4^{12};6^{10};8^6\}3\{4^3\}4$   
3,8-c net with stoichiometry  $(3-c)4(8-c)3$ ; 2-nodal net
