# Supplementary material for: Structures and catalytic oxidative coupling reaction of four Co-MOFs modified with R-isophthalic acid (RH, OH and COOH) and trigonal ligands
Source: Royal Society of Chemistry journal article supplement (doi:10.1039/d1ce01221e), 2021-01-01
Supplement: d1ce01221e2.pdf [file d1ce01221e2.pdf]

Table S1. Selected bond [ $\text{\AA}$ ] and angles [ $^\circ$ ] for **Co-MOFs**.

Table S2. Effect of the reaction temperature and time for the oxidative coupling reaction.

Table S1. Selected bond [ $\text{\AA}$ ] and angles [ $^\circ$ ] for **Co-MOFs**.

|                                                                                                   |            |               |            |
|---------------------------------------------------------------------------------------------------|------------|---------------|------------|
| Co1-O1                                                                                            | 2.154(3)   | Co1-O2        | 2.193(4)   |
| Co1-O3#1                                                                                          | 2.019(4)   | Co1-O4#1      | 2.060(3)   |
| Co1-N1                                                                                            | 2.118(3)   | Co1-N2        | 2.159(3)   |
| O1-Co1-N1                                                                                         | 98.70(12)  | O3#1-Co1-O4#2 | 119.66(14) |
| O3#2-Co1-N1                                                                                       | 92.20(13)  | O4#2-Co1-N1   | 89.77(12)  |
| O3#1-Co1-O1                                                                                       | 89.16(14)  | O4#2-Co1-O1   | 149.75(14) |
| O3#1-Co1-N2                                                                                       | 89.22(14)  | O4#2-Co1-N2   | 84.97(12)  |
| N1-Co1-N2                                                                                         | 174.56(13) | O1-Co1-N2     | 86.56(12)  |
| O3#1-Co1-O2                                                                                       | 148.93(12) | O4#2-Co1-O2   | 91.41(13)  |
| N1-Co1-O2                                                                                         | 87.48(14)  | O1-Co1-O2     | 60.28(12)  |
| N2-Co1-O2                                                                                         | 94.01(14)  |               |            |
| Symmetry codes for <b>Co-MOF-1</b> : #1 $-x+y+2/3, -x+1/3, z+1/3$ ; #2 $x-y+1/3, x-1/3, -z+5/3$ . |            |               |            |
| Co1-O1#1                                                                                          | 1.997(3)   | Co1-O2        | 1.998(3)   |
| Co1-O3#3                                                                                          | 2.201(3)   | Co1-O4#3      | 2.249(3)   |
| Co1-N1                                                                                            | 2.153(3)   | Co1-N3#2      | 2.147(3)   |
| O1#1-Co1-O2                                                                                       | 120.73(13) | O1#1-Co1-N3#2 | 93.43(12)  |
| O2-Co1-N3#2                                                                                       | 88.97(12)  | O1#1-Co1-N1   | 88.68(12)  |
| O2-Co1-N1                                                                                         | 88.01(12)  | N3#2-Co1-N1   | 176.91(12) |
| O1#1-Co1-O3#3                                                                                     | 87.21(13)  | O2-Co1-O3#3   | 151.40(13) |
| N3#2-Co1-O3#3                                                                                     | 95.77(12)  | N1-Co1-O3#3   | 86.59(12)  |
| O1#1-Co1-O4#3                                                                                     | 146.25(12) | O2-Co1-O4#3   | 92.61(12)  |
| N3#2-Co1-O4#3                                                                                     | 92.16(12)  | N1-Co1-O4#3   | 87.32(12)  |
| O3#3-Co1-O4#3                                                                                     | 59.11(12)  |               |            |
| Symmetry code for <b>Co-MOF-2</b> : #1 $-x+1/2, -y+1/2, -z$ ; #2                                  |            |               |            |

|                                                                                            |            |               |            |
|--------------------------------------------------------------------------------------------|------------|---------------|------------|
| x-1/2, -y+1/2, z-1/2; #3 -x+1/2, y+1/2, -z+1/2.                                            |            |               |            |
| Co1-O3#1                                                                                   | 2.199(3)   | Co1-O4#1      | 2.178(3)   |
| Co1-O1                                                                                     | 2.008(3)   | Co1-O2#2      | 2.048(2)   |
| Co1-N1                                                                                     | 2.160(3)   | Co1-N2        | 2.137(3)   |
| O1-Co1-O2#2                                                                                | 118.29(11) | O1-Co1-N2     | 92.53(12)  |
| O2#2-Co1-N2                                                                                | 89.92(10)  | O1-Co1-N1     | 89.55(11)  |
| O2#2-Co1-N1                                                                                | 85.13(10)  | N2-Co1-N1     | 175.04(10) |
| O3#1-Co1-O2#2                                                                              | 150.15(12) | O2#2-Co1-O4#1 | 92.18(11)  |
| N2-Co1-O4#1                                                                                | 87.55(12)  | N1-Co1-O4#1   | 92.94(12)  |
| O3#1-Co1-O1                                                                                | 90.20(12)  | O4#1-Co1-O3#1 | 59.70(11)  |
| N2-Co1-O3#1                                                                                | 98.00(11)  | N1-Co1-O3#1   | 86.49(11)  |
| Symmetry code for <b>Co-MOF-3</b> : #1 -x+y+2/3, -x+4/3, z+1/3; #2 -x+4/3, -y+5/3, -z+2/3. |            |               |            |
| Co1-O1                                                                                     | 2.0001(10) | Co1-O2#1      | 2.0082(8)  |
| Co1-O6#2                                                                                   | 2.1219(8)  | Co1-O5#2      | 2.2833(10) |
| Co1-N1                                                                                     | 2.1756(11) | Co1-N2#2      | 2.1627(12) |
| Co2-O3                                                                                     | 2.0810(8)  | Co2-O7        | 2.1096(11) |
| Co2-N3#4                                                                                   | 2.1633(11) |               |            |
| O1-Co1-O2#1                                                                                | 113.13(4)  | O1-Co1-O6#2   | 91.80(4)   |
| O2#1-Co1-O6#2                                                                              | 154.95(4)  | O1-Co1-N2#2   | 91.10(5)   |
| O2#2-Co1-N2#2                                                                              | 89.43(4)   | O6#2-Co1-N2#2 | 87.62(4)   |
| O1-Co1-N1                                                                                  | 89.20(5)   | O2#1-Co1-N1   | 90.47(4)   |
| O6#2-Co1-N1                                                                                | 92.34(4)   | N2#2-Co1-N1   | 179.70(4)  |
| O1-Co1-O5#2                                                                                | 150.93(4)  | O2#1-Co1-O5#2 | 95.92(3)   |
| O6#2-Co1-O5#2                                                                              | 59.25(3)   | N2#2-Co1-O5#2 | 90.38(4)   |
| N1-Co1-O5#2                                                                                | 89.34(4)   | O3-Co2-O3#3   | 180.00(5)  |
| O3-Co2-O7                                                                                  | 88.94(4)   | O3#3-Co2-O7   | 91.05(4)   |
| O7-Co2-O7#3                                                                                | 180.0      | O3-Co2-N3#4   | 91.21(4)   |
| O3#3-Co2-N3#4                                                                              | 88.79(4)   | O7-Co2-N3#4   | 89.33(5)   |

|                                                                                                                               |          |               |       |
|-------------------------------------------------------------------------------------------------------------------------------|----------|---------------|-------|
| O7#3-Co2-N3#4                                                                                                                 | 90.67(5) | N3#4-Co2-N3#5 | 180.0 |
| Symmetry code for <b>Co-MOF-4</b> : #1 -x+1, -y, -z+1; #2 -x, -y, -z+1; #3 -x+1, -y+1, -z; #4 -x, -y+1, -z+1; #5 x+1, y, z-1. |          |               |       |

Table S2 Effect of the reaction temperature and time for the oxidative coupling reaction.<sup>a</sup>

| Entry | Catalyst        | Base | Temp.(°C) | Time (h) | Conv.(%) <sup>b</sup> |
|-------|-----------------|------|-----------|----------|-----------------------|
| 1     |                 |      |           | 2        | 7                     |
| 2     | <b>Co-MOF-4</b> | KOH  | rt.       | 6        | 30                    |
| 3     |                 |      |           | 12       | 50                    |
| 4     |                 |      |           | 2        | 13                    |
| 5     | <b>Co-MOF-4</b> | KOH  | 60        | 6        | 42                    |
| 6     |                 |      |           | 12       | 76                    |
| 7     |                 |      |           | 2        | 18                    |
| 8     | <b>Co-MOF-4</b> | KOH  | 100       | 6        | 54                    |
| 9     |                 |      |           | 8        | 73                    |
| 10    |                 |      |           | 2        | 48                    |
| 11    | <b>Co-MOF-4</b> | KOH  | 120       | 8        | 85                    |
| 12    |                 |      |           | 12       | 74                    |

<sup>a</sup> 1a (1.0 mmol), 2a (1.5 mmol), **Co-MOF-4** (0.2 mmol%), KOH (0.1 mmol), pyrene (100  $\mu$ L, as an internal standard), solvent-free conditions; <sup>b</sup> determined by GC-MS.
